# Supplementary material for: Electrochemical topography of a cell monolayer with an addressable microelectrode array
Source: Royal Society of Chemistry journal article supplement (doi:10.1039/b915212a), 2009-12-04
Supplement: b915212a.pdf [file b915212a.pdf]

1 **Supporting Information**

2

3 **Electrochemical topography of a cell monolayer with an**  
4 **addressable microelectrode array**

5 Zhenyu Lin, Kosuke Ino, Hitoshi Shiku, Tomokazu Matsue

6

7 **Fabrication of microelectrode array**

8 An electrode array with 6 platinum microbands was constructed on a glass  
9 substrate using a photolithographic method. The glass substrates were cleaned by  
10 ultrasonication in acetone and 2-propanol. It was then spin-coated (3000 rpm for 30 s)  
11 with a primer and positive photoresist (S1818, Shipley Far East Ltd., Japan), and  
12 subsequently baked at 95°C for 5 min. This was followed by irradiation with UV light  
13 for 11 s through a chromium mask with microelectrode patterns. After developing  
14 with a developer, Ti and Pt were deposited on the substrate by sputtering to create a  
15 Ti/Pt multilayer. The electrode pattern was revealed with a lift-off technique after  
16 immersing the electrode substrate in an acetone bath.

17 Each band was 100 nm thick and 50  $\mu\text{m}$  wide and was separated by a distance of  
18 250  $\mu\text{m}$  from the adjacent band electrodes. A rectangle wall without one side was  
19 fabricated on the substrate by photolithography using an SU-8 sheet (thickness:  
20 15- $\mu\text{m}$ ; TR61965, Taiyo Ink MFG Co., Tokyo, Japan). As shown in Fig.1b, another  
21 glass substrate without the SU-8 sheet (act as column electrodes) was covered on the  
22 top of the glass substrate with the SU-8 sheet (act as row electrodes) so that the two  
23 microelectrodes arrays on the glass substrates were orthogonal and faced each other,

24 the column electrodes and row electrodes forming 36 orthogonal crossing points.  
25 These points will act as the addressing points in this study. The open space held by the  
26 SU-8 sheet between the two glass substrates served as the working area.

## 27 **Instrumentation**

28 Three channels (W1 to W3) of a multichannel potentiostat (HA-1010mM4,  
29 Hokuto Denko, Corp., Tokyo, Japan) were used for potential control and current  
30 acquisition. The potentiostat was connected to the electrodes by a multiplexer  
31 (PXI-2529 combined with TB-2634, National Instrument, Austin, USA) and the data  
32 was controlled and collected by a program developed by Labview (National  
33 Instrument, Austin, USA) through an AD/DA converter (PXI-6723, National  
34 Instrument, Austin, USA). Ag/AgCl and a Pt wire were used as the reference and  
35 counter electrodes, respectively.

## 36 **2.3 Cell pattern preparation**

37 HeLa cells, derived from a human cervix epithelial cell line, were routinely  
38 cultured in a RPMI1640 medium (Gibco) containing 10% fetal bovine serum (Gibco)  
39 and 1% penicillin in a humidified incubator (37°C in an atmosphere of 5% CO<sub>2</sub>). The  
40 HeLa cells were harvested and treated with a 0.25% trypsin solution before being  
41 seeded into the wells. The concentration of the cell suspension was approximately 1 ×  
42 10<sup>6</sup> cells/mL.

43 A PDMS (Sylgard 184, Dow Corning, Co.) stencil with a 500 μm × 500 μm hole  
44 was fabricated using a CO<sub>2</sub> laser engraving system (Universal Laser System Inc.) and  
45 the surface of the PDMS was treated with O<sub>2</sub> plasma [1, 2]. After sterilizing in 70%

46 ethanol, the stencil was attached to the substrate with the microelectrode array. Then,  
47 the cell suspension solution was dropped on the surface of the PDMS stencil. After  
48 cultivation for 6 h, the stencil was removed to leave the patterned cells adhered to the  
49 surface of the substrate. The substrate combined with another electrode substrate as  
50 described above to form the addressable device.

### 51 **Detection procedure**

52 The detection procedure has been described in our earlier reports [3]. In brief, the  
53 row electrode substrate with the patterned cells was rinsed carefully with PBS(-)  
54 solution. Then a 4.0 mM  $\text{Fe}(\text{CN})_6^{3-}$  solution was applied to the substrate, which was  
55 then covered with the column electrode substrate. Electrochemical detection was  
56 performed as follows: a voltage ( $V_C = 0$  V) was applied to all the column electrodes  
57 through W1 of the potentiostat. At the same time a different voltage ( $V_R = 0.5$  V) was  
58 applied to the row electrode 1 (R1) through W3 of the potentiostat for 2 s for  
59 preconditioning purposes to stabilize the current, while the other row electrodes  
60 (R2–R6) were set at  $V_C$  through W1. Then, the column electrode 1 (C1) was  
61 connected to W2 set at  $V_C$ , and the current data were transferred to a PC. This  
62 read-out process was sequentially repeated from C1 to C6 with an interval of 20 ms  
63 for the read-out time in each step. All the current responses through W2 were read out,  
64 while W1 was used only for the potential control. Since all of the row electrodes were  
65 connected to W1 (set at  $V_C$ ) during the above process, no redox cycling was expected  
66 at the crossing points on R2–R6 during scanning. The same measurements were  
67 sequentially repeated for the other row electrodes (R2–R6) to address and acquire all

68 the responses at every crossing point. The total detection time for the 36 addressing  
69 points was less than 15 s. After the measurement, the substrate was rinsed with PBS(-)  
70 solution and the patterned cells were again cultivated in the cultivation medium.

71 After detection, the data at all addressable point were collected and applied to  
72 construct the cell images with a Matlab program (MathWorks, Natick, Massachusetts,  
73 USA).

#### 74 **Reference**

75 [1] H.Shiku, M.Takeda, T.Murata, U.Akib, F.Hamada, T.Matsue, *Anal. Chim. Acta.*  
76 2009, **640**, 87.

77 [2] Y.Takahashi, T.Miyamodo, H.Shiku, R.Asano, T. Yasukawa, I.Kumagai, T.Matsue,  
78 *Anal.Chem.* 2009, **81**, 2785.

79 [3] Z.Y.Lin, Y.Takahashi, Y.Kitagawa, T.Umemura, H.Shiku, T.Matsue, *Anal. Chem.*  
80 2008, **80**, 6830.

81
